# Supplementary material for: Efficient droplet activation of ambient black carbon particles in sub-urban environment
Source: Copernicus journal article supplement (doi:10.5194/egusphere-2023-2744), 2023-12-07
Supplement: Supplementary file 1 [file egusphere-2023-2744-supplement.pdf]

*Supplement of*

**Efficient droplet activation of ambient black carbon particles in sub-urban environment**

Ping Tian et al.

*Corresponding to:* Dantong Liu ([dantongliu@zju.edu.cn](mailto:dantongliu@zju.edu.cn))

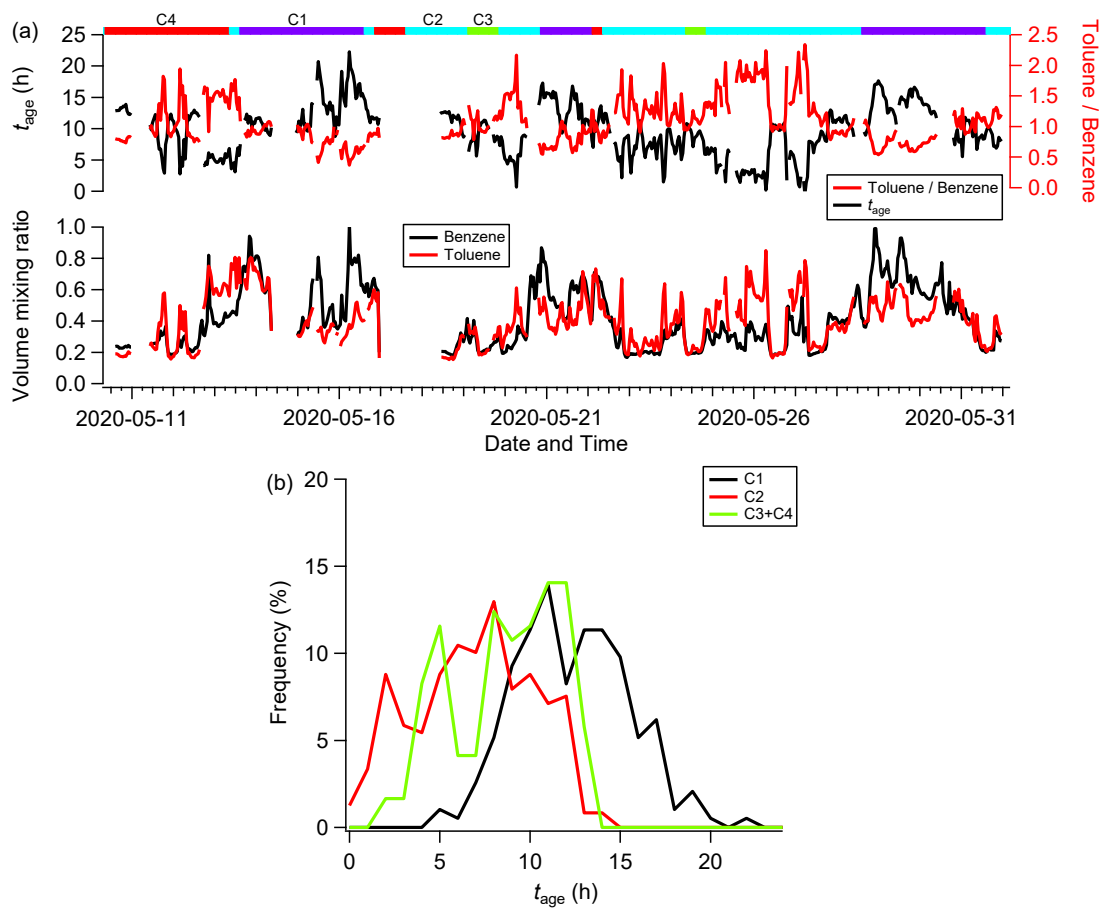

**Figure S1.** Time series of Benzene and Toluene mass concentrations, the ratio of Toluene and Benzene, and  $t_{\text{age}}$  (a). Frequency analysis of  $t_{\text{age}}$  at three different clusters (b).

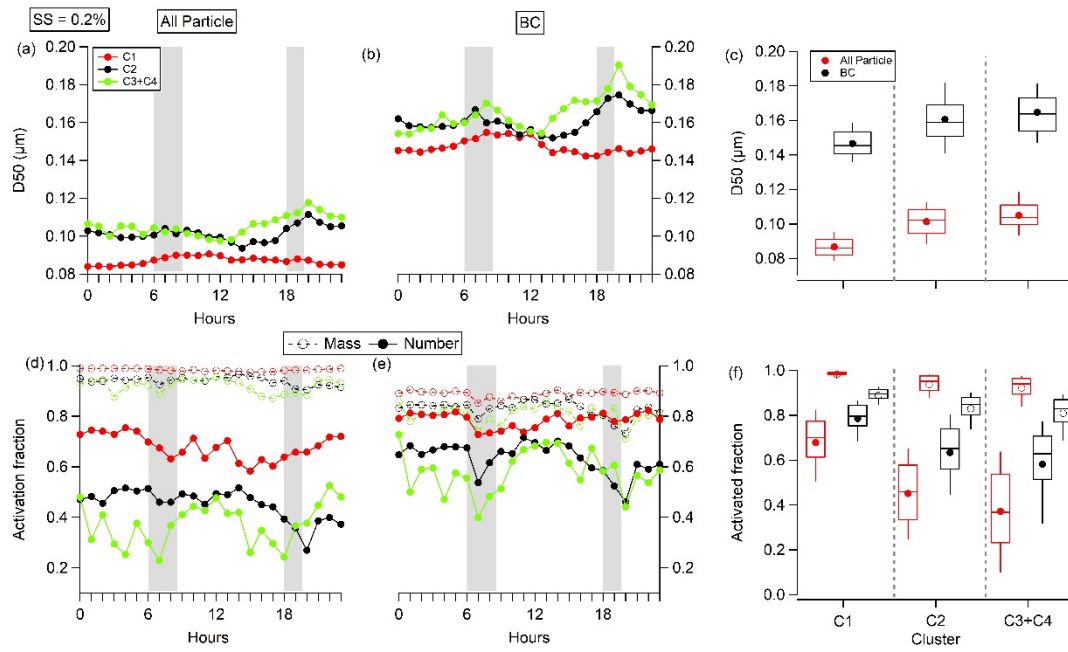

**Figure S2.** Under  $SS=0.2\%$ , a) and b) four clusters diurnal variations of activation diameter ( $D_{50}$ ), d), e) mass and number activation fraction ( $F_{act}$ ) for all particle and BCc, respectively. c)  $D_{50}$  and f)  $F_{act}$ , distributions of all-particles and BCc for four clusters, with solid circle indicating the average; in each box, the solid line and top and bottom boundaries represent the median, 75<sup>th</sup> and 25<sup>th</sup>, respectively.

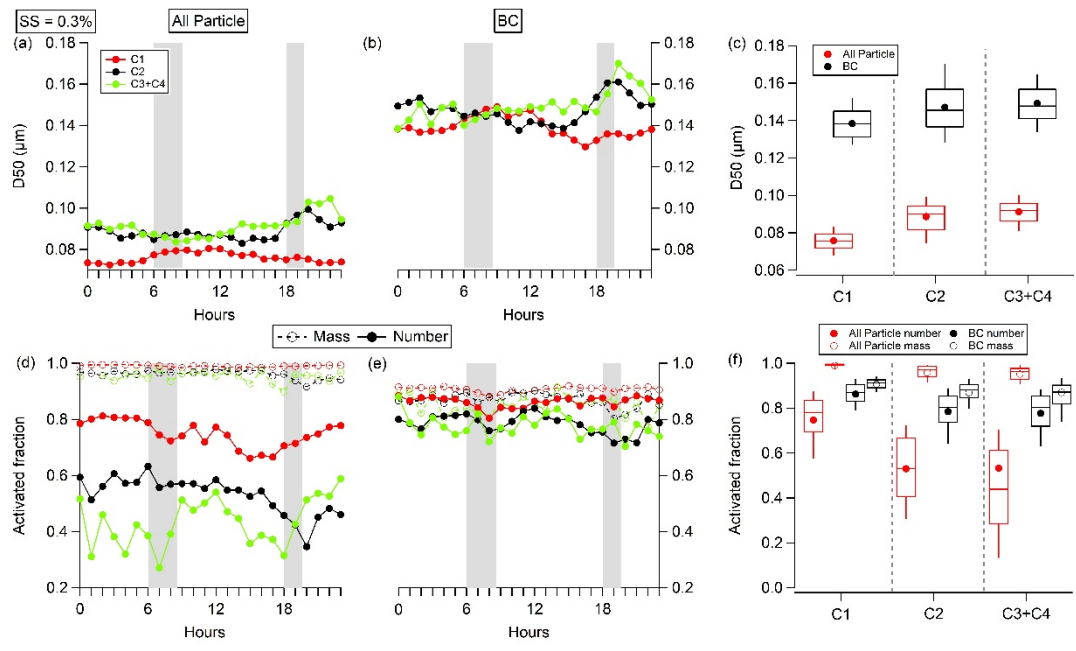

**Figure S3.** Identical plots with Fig. S2 but for  $SS=0.3\%$ .

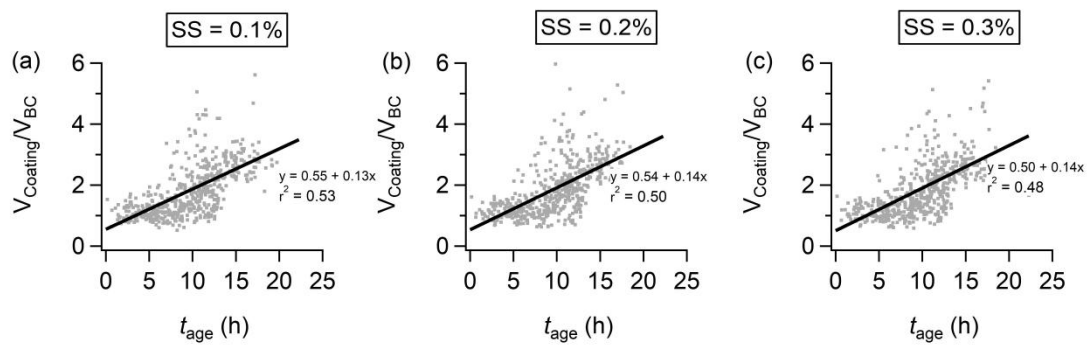

Figure S4. The evolution of volume ratios of coating over rBC with photochemical age ( $t_{\text{age}}$ ) under SS at 0.1%, 0.2%, c) 0.3%.
